# Supplementary material for: Rapid and selective detection of cysteine over homocysteine and glutathione by a simple and effective coumarin-based fluorescent probe
Source: Royal Society of Chemistry journal article supplement (doi:10.1039/c6ra19267j), 2016-01-01

---

## SUPPORTING INFORMATION

### **Rapid and selective detection of cysteine over homocysteine and glutathione by a simple and effective coumarin-based fluorescent probe**

**Yan-Fei Kang,<sup>\*a</sup> Hai-Xia Qiao,<sup>a</sup> Ya-Li Meng,<sup>a</sup> Sai-Jin Cui,<sup>a</sup> Ya-Jun Han,<sup>a</sup> Zhi-Yong Wu,<sup>b</sup> Jie Wu,<sup>a</sup> Xiao-Hui Jia,<sup>a</sup> Xiao-Lei Zhang<sup>a</sup> and Ming-Yan Dai<sup>a</sup>**

<sup>a</sup>College of Laboratory Medicine, Hebei North University, 11 Diamond Street South, Zhangjiakou, Hebei, 075000, People's Republic of China. Fax: +86-313-4029275; Tel: +8618931319293. E-mail: kangyanfei172@163.com

<sup>b</sup>College of Science, Hebei North University, 11 Diamond Street South, Zhangjiakou, Hebei, 075000, China.

## 1. General information

Unless otherwise noted, materials were purchased from commercial suppliers and used without further purification. All the solvents were purified and dried according to general methods.  $^1\text{H}$  NMR spectra were recorded on a Bruker AVIII-400 MHz spectrometer. Chemical shifts (in ppm) were determined by reference to the residual solvent peak (Acetone- $d_6$ : 2.05 ppm). Data are reported as follows: chemical shift, multiplicity (s = singlet, d = doublet, t = triplet, m = multiplet), coupling constants (Hz) and integration.  $^{13}\text{C}$  NMR spectra were recorded on the same NMR spectrometer. Chemical shifts (in ppm) were determined by reference to the residual solvent peak (Acetone- $d_6$ : 30.92 ppm). High resolution mass spectra (HRMS) were measured with Thermo (orbitrap Elite). Absorption spectra were measured using a Thermo (BioMate 3S) UV/Vis spectrophotometer. Fluorescence measurements were carried out with a F97pro fluorospectrophotometer.

## 2. Synthesis of the probe 1

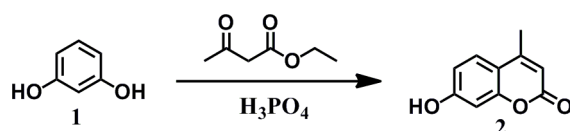

**7-Hydroxy-4-methylcoumarin 2** To the mixture of 3-hydroxyphenol (2.2 g, 20 mmol) and ethyl acetoacetate (2.6 mL, 20 mmol) was added concentrated phosphoric acid (15 mL, 85%). After the reaction was stirred for 12 h at room temperature, the reaction mixture was poured into 30 mL water. The crude product was collected by filtration and further purified by recrystallization in ethanol to afford the 7-Hydroxy-4-methylcoumarin **2** as a white crystal (yield: 82%).  $^1\text{H-NMR}$  (400 MHz, acetone- $d_6$ ):  $\delta$  = 2.41 (s, 3 H), 4.65 (s, 1 H), 6.07 (s, 1 H), 6.74 (d,  $J$  = 2.4 Hz, 1 H), 6.85 (dd,  $J$  = 8.8, 2.4 Hz, 1 H), 7.61 (d,  $J$  = 8.8, Hz, 1 H) ppm;  $^{13}\text{C-NMR}$  (100 MHz, acetone- $d_6$ ):  $\delta$  = 17.6, 102.4, 110.9, 112.6, 112.8, 126.4, 152.9, 155.5, 160.1, 161.0 ppm.

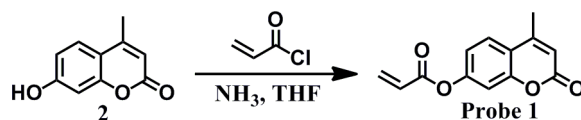

**7- Yl-acrylate-4-methylcoumarin Probe 1** To the solution of compound **2** (1.76 g, 10 mmol) in an anhydrous tetrahydrofuran (40 mL) was added dropwise triethylamine (2.1 mL, 15 mmol) at 0 °C. After the reaction was stirred for 0.5 h, then acryloyl chloride (1.2 mL, 15 mmol) was added dropwise to the above solution at 0 °C, then the mixture continues to react for 6 h. The solvent was evaporated and the residue was purified by column chromatography (silica gel; petroleum/ethyl acetate 15/1) to provide the 7-yl-acrylate-4-methylcoumarin Probe **1** as a white solid (yield: 60%).  $^1\text{H-NMR}$  (400 MHz, acetone- $d_6$ ):  $\delta$  = 3.51 (s, 3 H), 6.15 (dd,  $J$  = 10.4, 1.2 Hz, 1 H),

6.31(s, 1 H), 6.41 (dd,  $J = 17.2, 10.4$  Hz, 1 H), 6.61(dd,  $J = 17.2, 1.2$  Hz, 1 H), 7.20 (d,  $J = 2.0$  Hz, 1 H), 7.23(d,  $J = 2.0$  Hz, 1 H), 7.84(d,  $J = 8.4$  Hz, 1 H) ppm;  $^{13}\text{C-NMR}$  (100 MHz, acetone- $d_6$ ):  $\delta = 17.7, 110.0, 114.1, 117.9, 118.0, 126.1, 127.5, 133.0, 152.4, 153.2, 154.4, 159.4, 163.5$  ppm; **HRMS** (ESI)  $m/z$  calcd for  $\text{C}_{13}\text{H}_{10}\text{O}_4(\text{M}+\text{H})$ : 231.0652. Found: 231.0656, error: 1.7 ppm.

### 3. Assay for cytotoxic activity of the probe 1

The cytotoxic activity was assessed by the well-known MTT assay, which is based on the formation of a purple formazan dye from the reduction of MTT mainly by the mitochondrial succinate dehydrogenase of active cells. HeLa cells ( $5 \times 10^4/\text{mL}$ ) were seeded in 96-well flat microtiter plates for adherence for 24 h, then the cells were incubated with assigned concentrations of probe 1 for another 24 h. Thereafter, 100  $\mu\text{L}$  medium with MTT solution was supplemented to each well and plates were incubated for 4 h at 37  $^\circ\text{C}$  in the dark. The culture medium was then removed followed by the addition of 100  $\mu\text{L}$  DMSO. The absorbance was read at 490 nm using a Thermo (Multiskan MK3) microplate reader. The percentage of cell viability was calculated relative to control wells designated as 100% viable cells.

### 4. Fluorescence image of probe 1 in HeLa cells

HeLa cells ( $5 \times 10^4/\text{mL}$ ) were seeded in 6-well flat microtiter plates for adherence for 24 h. Cells were incubated with probe 1 (10  $\mu\text{M}$ ) for 30 minutes, and then washed with PBS for 3 times. In the *N*-ethyl maleimide (NEM) experiment, cells were pre-incubated with NEM (1 mM) for 30 min. Cells were then washed with PBS before fluorescence images were acquired. Fluorescence images of the cells were obtained by a fluorescence microscope.

### 5. Figures S1 and S2

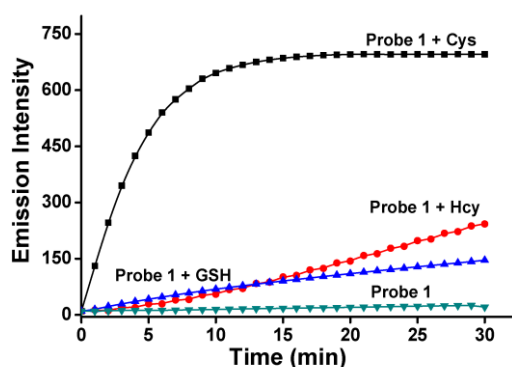

Fig. S1 Time-dependent fluorescence spectra of probe 1 (10  $\mu\text{M}$ ) with presence of Cys, Hys and GSH in aqueous solution (pH 7.4 PBS, containing 1% DMSO) at room temperature,  $\lambda_{\text{ex}} = 340$  nm..

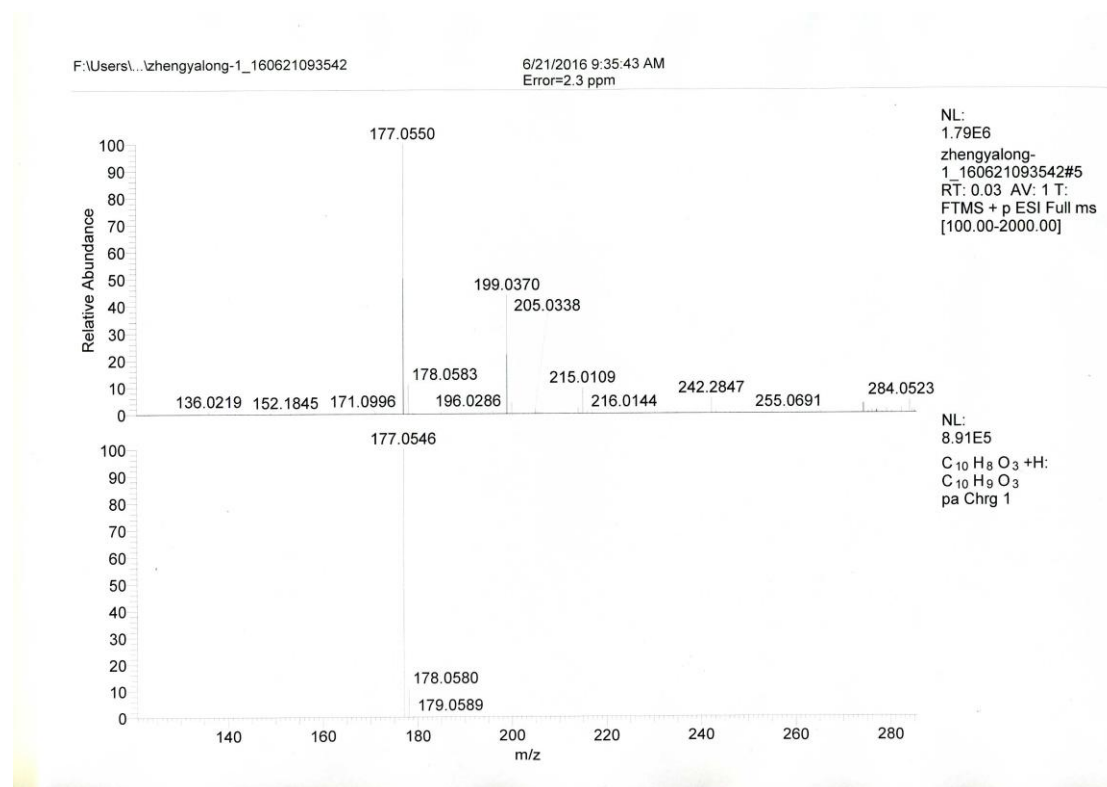

Fig. S2 The HRMS chart of probe 1 in the presence of Cys.

## 6. <sup>1</sup>H NMR, <sup>13</sup>C NMR and HRMS of compounds

### 6.1. <sup>1</sup>H NMR and <sup>13</sup>C NMR of compound 2

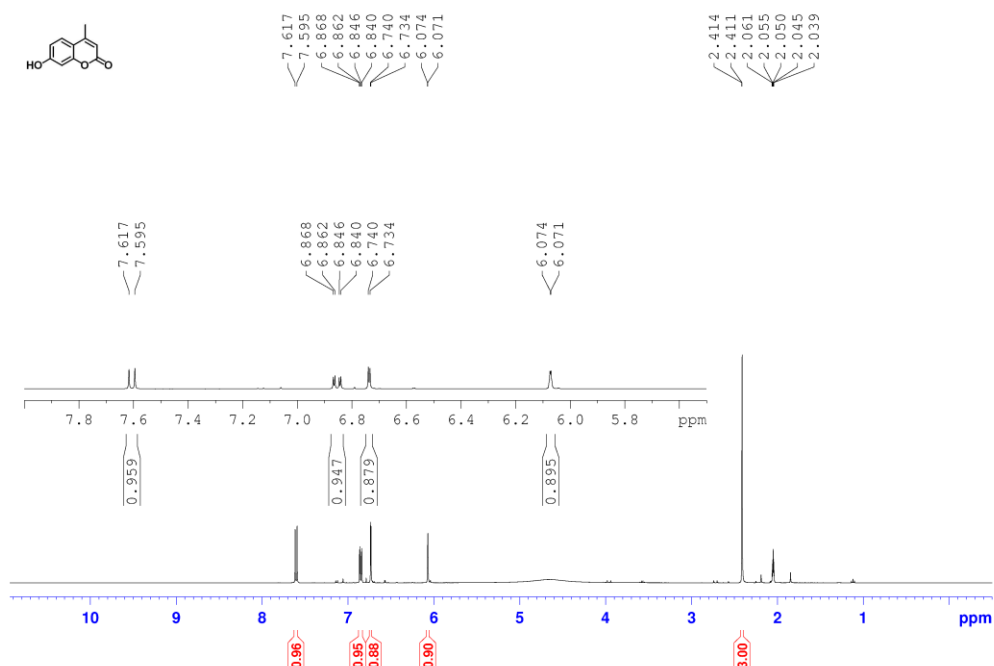

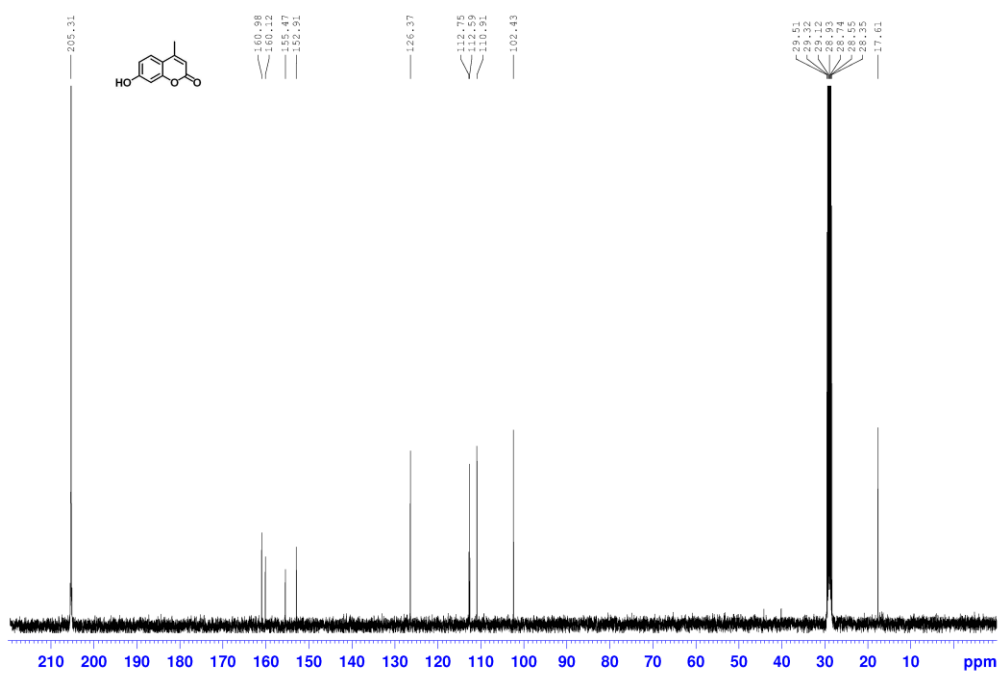

## 6.2. <sup>1</sup>H NMR, <sup>13</sup>C NMR and HRMS of probe 1

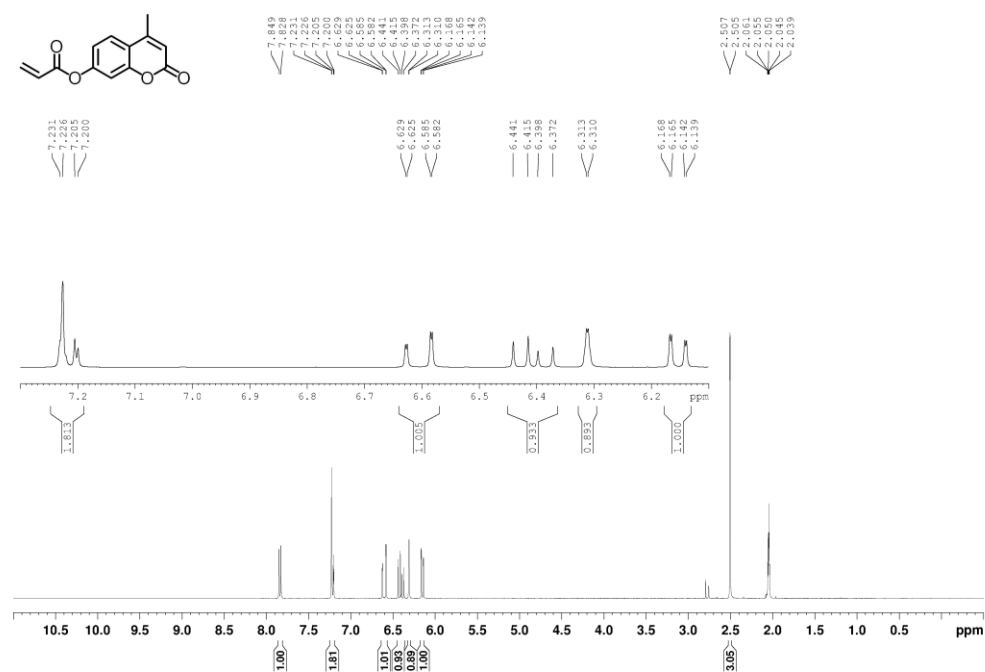

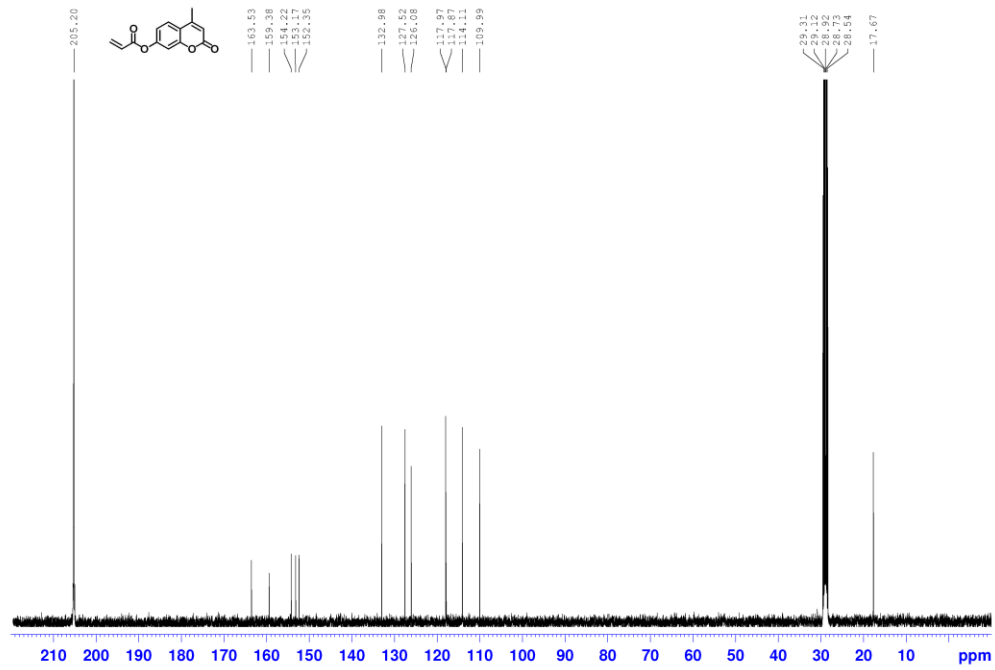

F:\Users\... \zhengyalong-2\_160621093542

6/21/2016 9:41:20 AM  
Error=1.7 ppm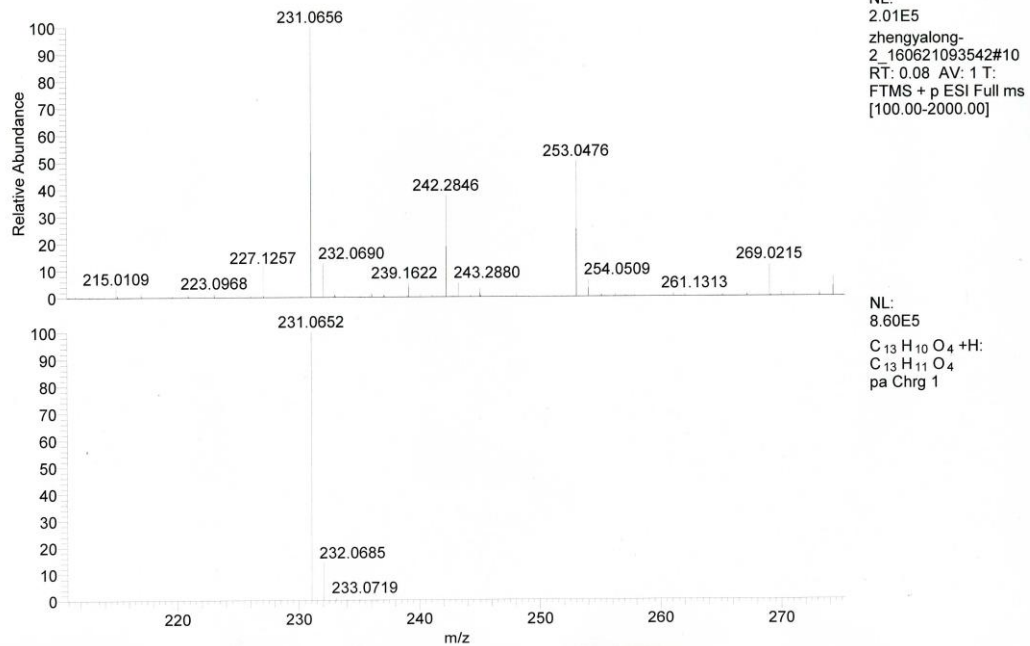

Supplement: c6ra19267j1.pdf [file c6ra19267j1.pdf]
